# Supplementary material for: Moisture-resistant Nb-based fluoride K2NbF7:Mn4+and oxyfluoride phosphor K3(NbOF5)(HF2):Mn4+: synthesis, improved luminescence performance and application in warm white LEDs
Source: Royal Society of Chemistry journal article supplement (doi:10.1039/d1dt03341g), 2021-01-01
Supplement: d1dt03341g1.pdf [file d1dt03341g1.pdf]

## Electronic Supplementary Information (ESI)

### Moisture-resistant Nb-based fluoride $\text{K}_2\text{NbF}_7:\text{Mn}^{4+}$ and oxyfluoride phosphor $\text{K}_3(\text{NbOF}_5)(\text{HF}_2):\text{Mn}^{4+}$ : synthesis, improved luminescence performance and application in warm white LED

Ge Pang<sup>1</sup>, Feng Hong<sup>1</sup>, Xiaoyi Liu<sup>1,3</sup>, Zhendong Fu<sup>2</sup>, Chunyan Zhang<sup>1</sup>, Tengri Dong<sup>1</sup>, Yunxiao Zhang<sup>2</sup>, Guixia Liu<sup>1\*</sup>, Jinxian Wang<sup>1</sup>, Dan Li<sup>1</sup> and Xiangting Dong<sup>1</sup>

<sup>1</sup>Key Laboratory of Applied Chemistry and Nanotechnology at Universities of Jilin Province, Changchun University of Science and Technology, Changchun 130022, China

<sup>2</sup>Tianjin Jinhang Technical Physics Institute, Tianjin, 300070, P.R. China

<sup>3</sup>College of Materials Science and Engineering, Changchun University of Science and Technology, Changchun 130022, China

\*Corresponding author. Tel.: +86-431-85383815; Tel: +86-431-85582574

E-mail address: [liuguixia22@163.com](mailto:liuguixia22@163.com).

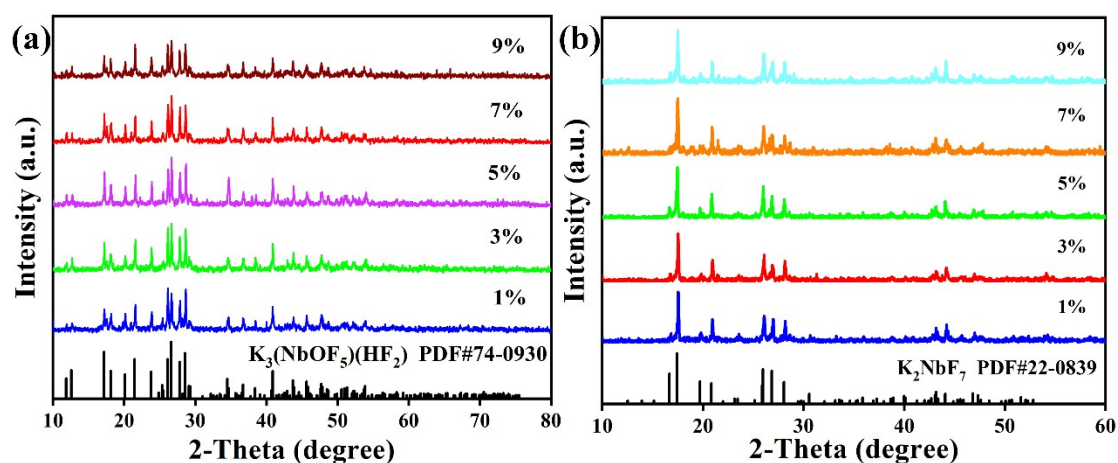

Fig. S1 XRD patterns of the phosphors  $\text{K}_3(\text{NbOF}_5)(\text{HF}_2):\text{Mn}^{4+}$  (a) and  $\text{K}_2\text{NbF}_7:\text{Mn}^{4+}$  (b)
